# Supplementary material for: UVB exposure enhanced the dermal penetration of zinc oxide nanoparticles and induced inflammatory responses through oxidative stress mediated by MAPKs and NF-κB signaling in SKH-1 hairless mouse skin
Source: Royal Society of Chemistry journal article supplement (doi:10.1039/c6tx00026f), 2016-01-01
Supplement: c6tx00026f1.pdf [file c6tx00026f1.pdf]

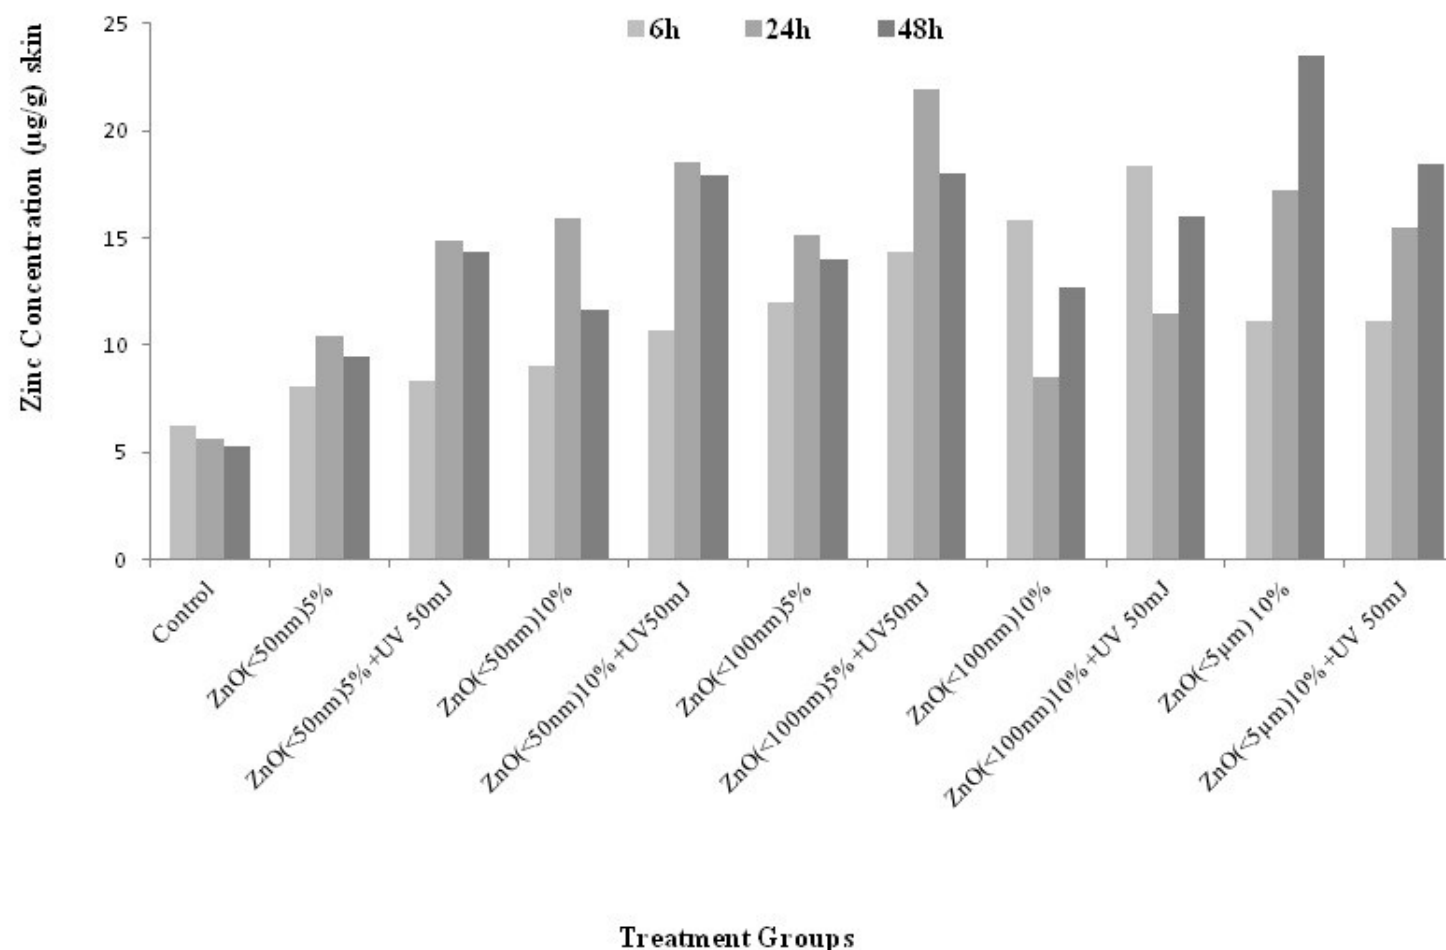

**Fig.S1.** Estimation of Zn ion content in skin tissue. Mice were topically exposed to ZnO-NPs (<50 nm, <100 nm) of 5% and 10%, bulk (<5 µm) of 10% dose alone or followed by UVB irradiation as described in Materials and Methods. Treated mice were sacrificed at 6, 24 and 48 h. Skin samples were predigested in 1-3 ml of ultrapure nitric acid and 0.1–0.3ml of perchloric acid and heated at 160°C until the solutions become colorless and clear. The solutions were finally diluted to 5 ml with ultrapure water and the total Zn content was analyzed as described in Materials and Methods. Data represent in ng/mg of skin sample.
